# Supplementary material
Source: publisher figshare collection journal article supplement (https://acs.figshare.com/ndownloader/files/13824122)
Supplement: Supplementary file 1 [file 13824122]

Supporting Information for

**Supercooling and Nucleation of Fatty Acids:  
Influence of Thermal History on the Behavior of the Liquid Phase**

John A. Noël,<sup>a</sup> Laurent Kreplak,<sup>b,c</sup> Nuwansiri Nirosh Getangama,<sup>d</sup> John R. de Bruyn<sup>d</sup>  
and Mary Anne White<sup>a,b,c,\*</sup>

<sup>a</sup> Department of Chemistry, Dalhousie University, Halifax, Nova Scotia, B3H 4R2, Canada

<sup>b</sup> Department of Physics and Atmospheric Science, Dalhousie University, Halifax, Nova Scotia, B3H 4R2, Canada

<sup>c</sup> Clean Technology Research Institute, Dalhousie University, Halifax, Nova Scotia, B3H 4R2, Canada

<sup>d</sup> Department of Physics and Astronomy, University of Western Ontario, London, Ontario, N6A 3K7, Canada

\*Corresponding author; email: mawhite@dal.ca

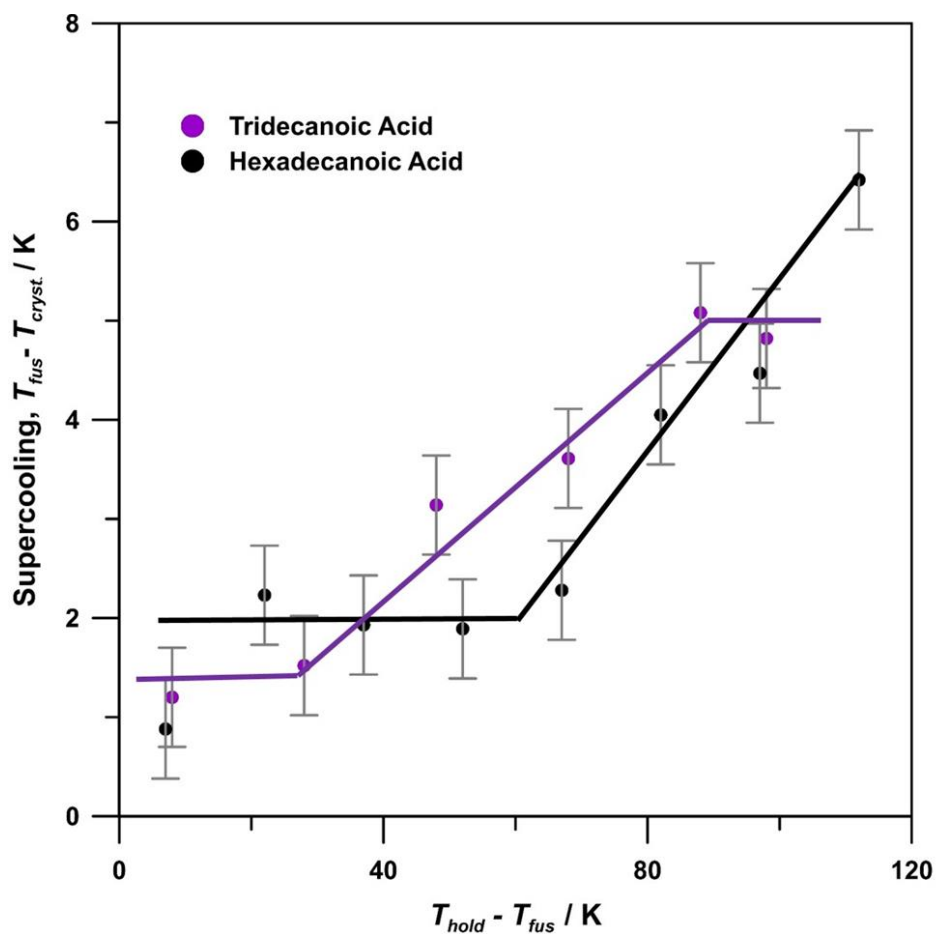

**Figure S1.** Supercooling at crystallization ( $T_{fus} - T_{cryst}$ ), where  $T_{cryst}$  is the crystallization temperature, as a function of the holding temperature,  $T_{hold}$ , relative to the melting temperature,  $T_{fus}$ , for tridecanoic and hexadecanoic acids.

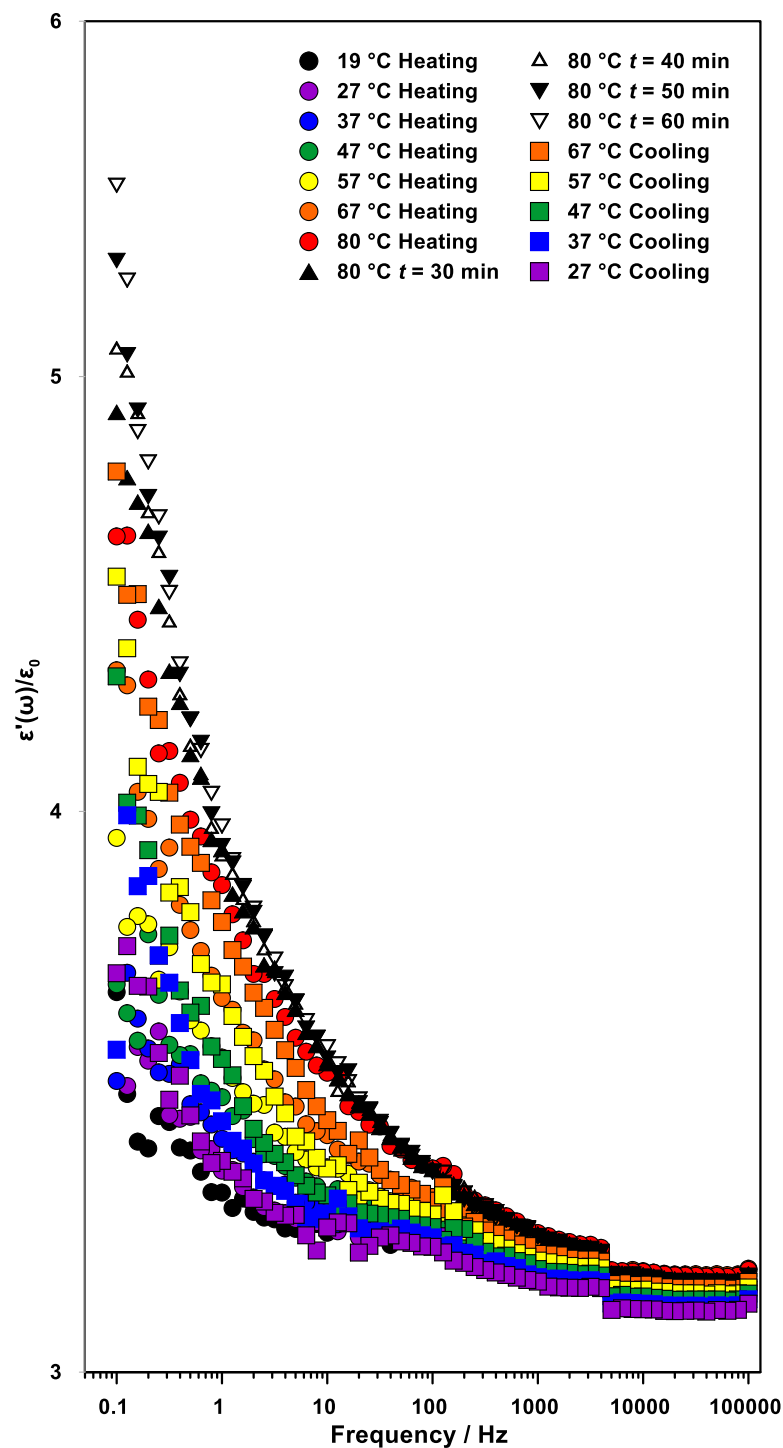

**Figure S2.** The real portion of the dielectric constant of octanoic acid ( $T_{fus} = 16\text{ }^{\circ}\text{C}$ ) as a function of frequency on heating, over the isothermal holding period at  $132\text{ }^{\circ}\text{C}$ , and on cooling. The fatty acid was held at  $80\text{ }^{\circ}\text{C}$  for 60 min between the heating and cooling cycles. Measurements made on heating are represented by circles; measurements made on cooling are represented by squares, with the same colour for a given temperature.

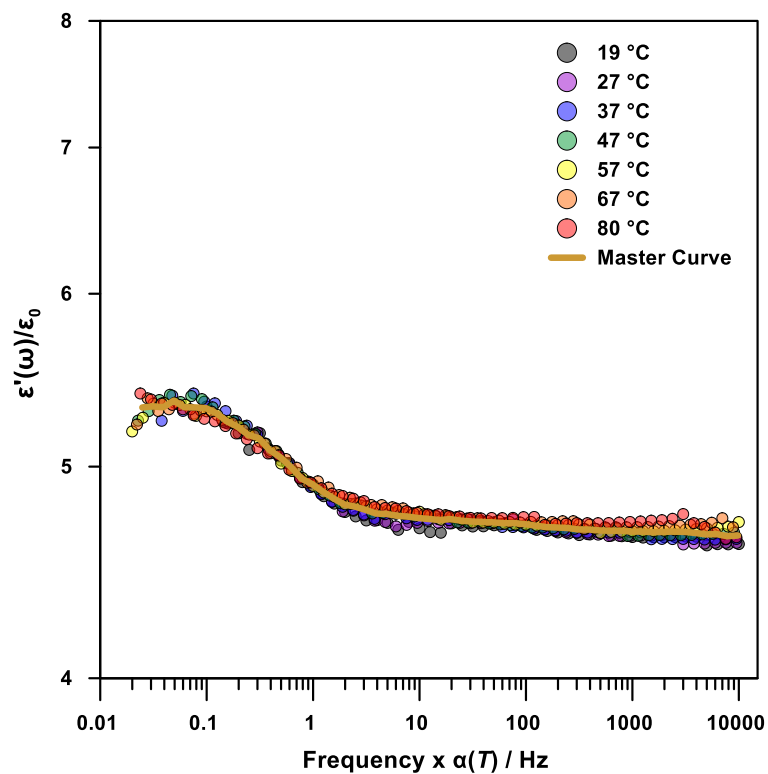

**Figure S3.** Master curve for the real part of the dielectric constant of octanoic acid ( $T_{fus} = 16\text{ }^{\circ}\text{C}$ ) created by shifting the individual  $\varepsilon'(\omega)$  curves by a factor  $\alpha(T)$  to bring them in line with the reference curve, chosen as the curve from the measurement made at  $19\text{ }^{\circ}\text{C}$ .

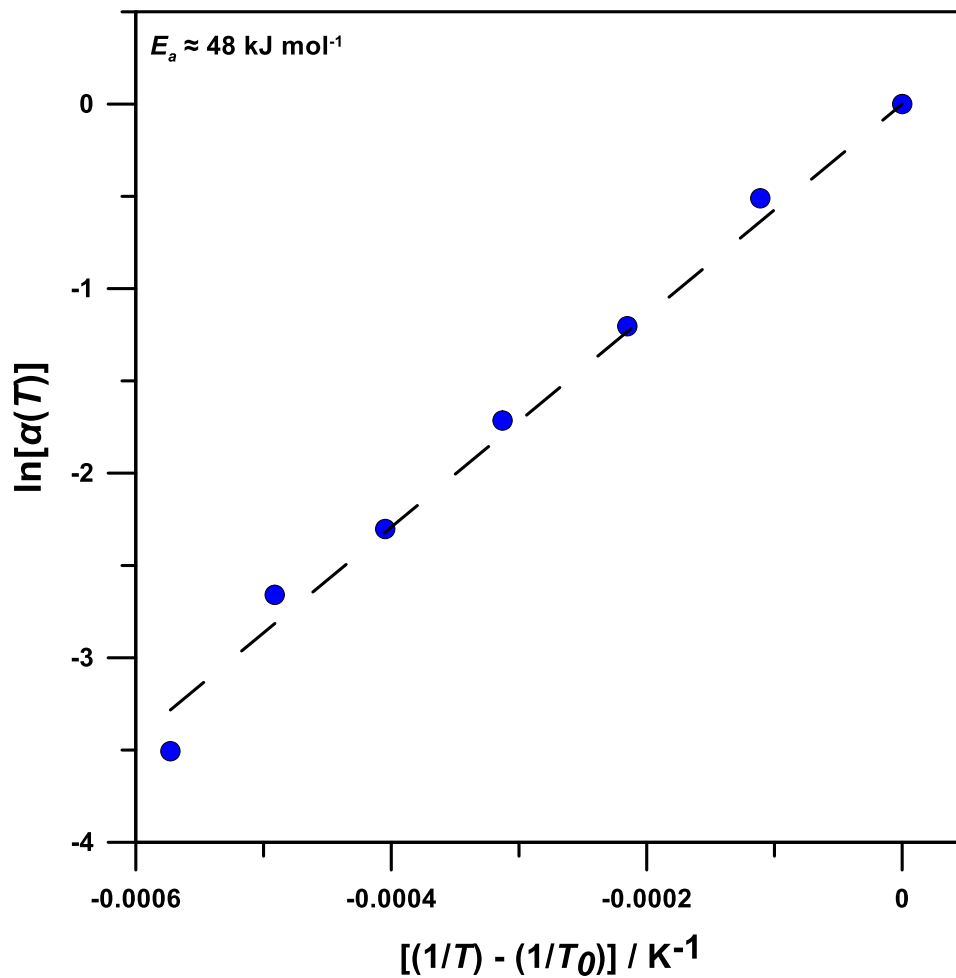

**Figure S4.** Natural logarithm of the values of  $\alpha(T)$  used to create the master curve for octanoic acid ( $T_{fus} = 16 \text{ }^\circ\text{C}$ ) from the  $\varepsilon'(\omega)/\varepsilon_0$  curves measured on heating as a function of  $(1/T - 1/T_0)$ . The dashed line is a linear fit to Equation 3.6.

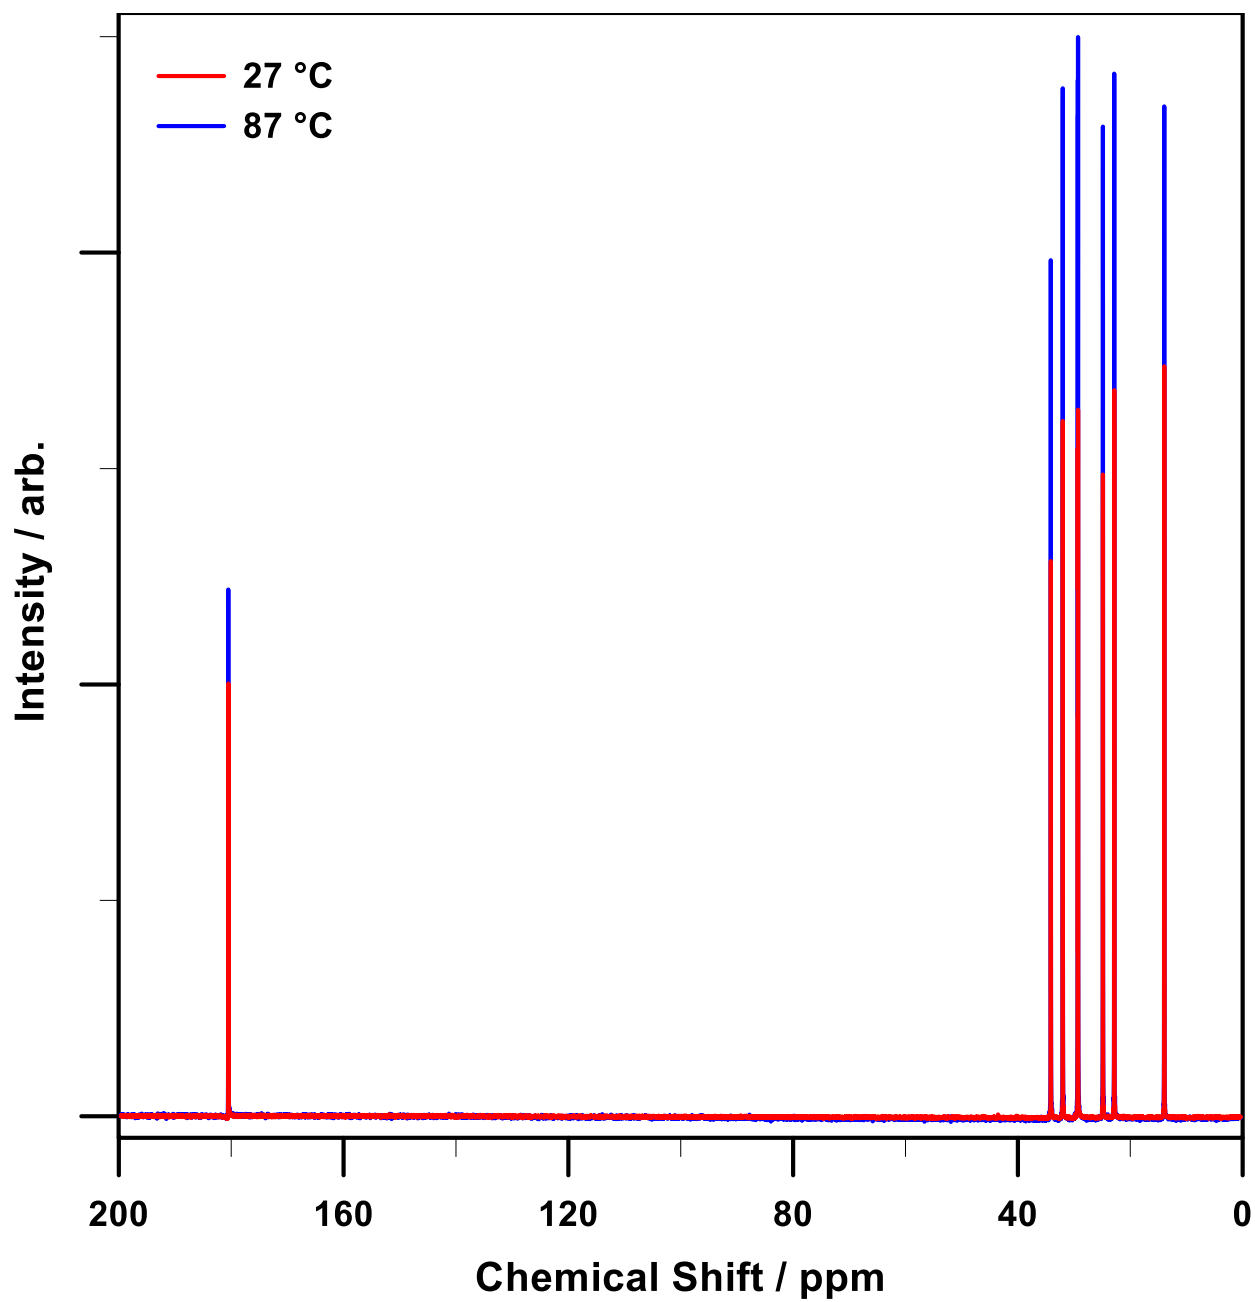

**Figure S5.** NMR spectrum of neat octanoic acid at 27 °C and 87 °C. The peaks corresponding to C<sub>4</sub> and C<sub>5</sub> are unresolved.

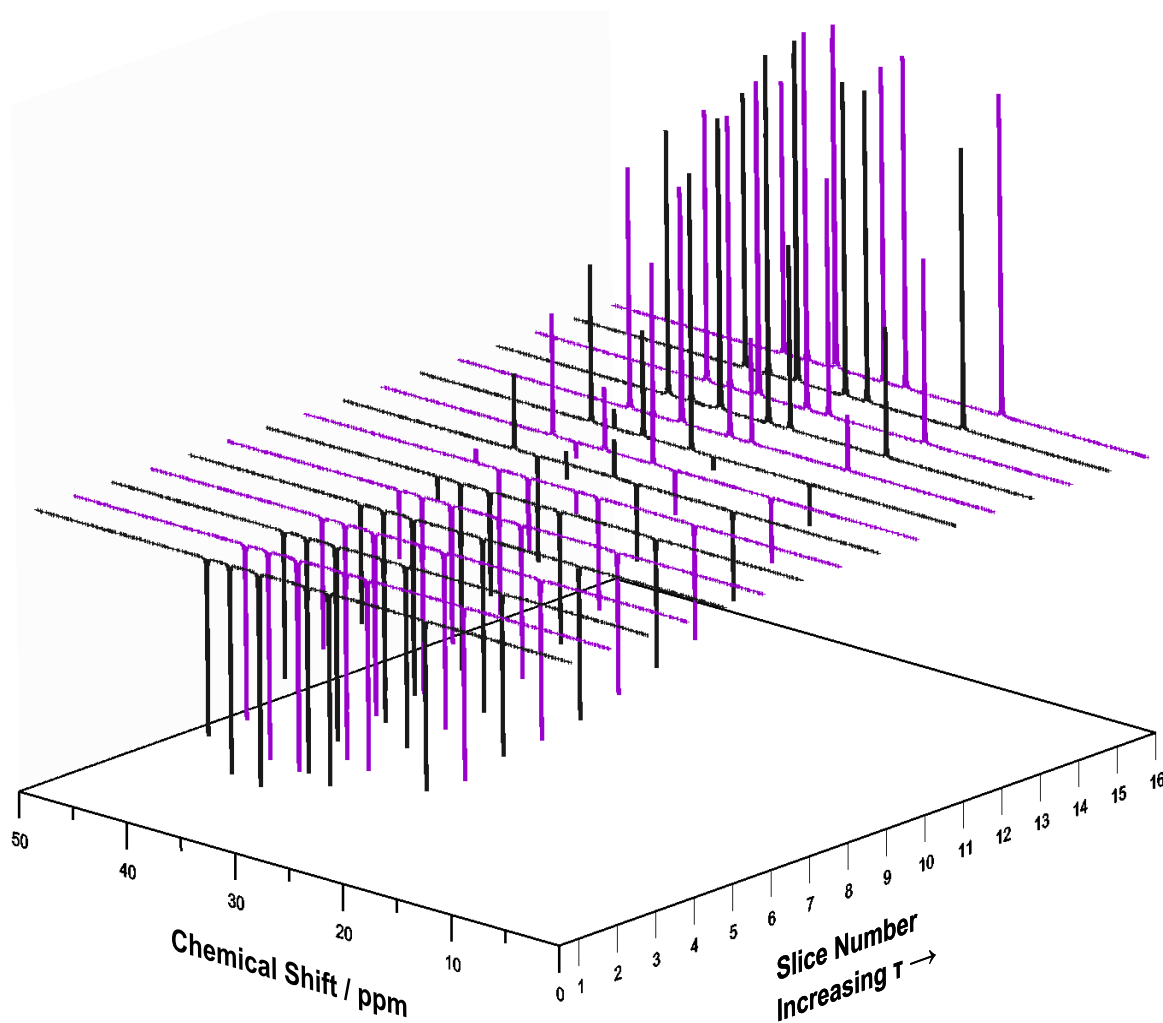

**Figure S6.** Example of a series of NMR spectra collected in an inversion recovery measurement. This example shows octanoic acid at 42 °C in the range of 0 to 50 ppm with spectra collected with 16 values of  $\tau$ , where  $0.001 \text{ s} < \tau < 40 \text{ s}$ .

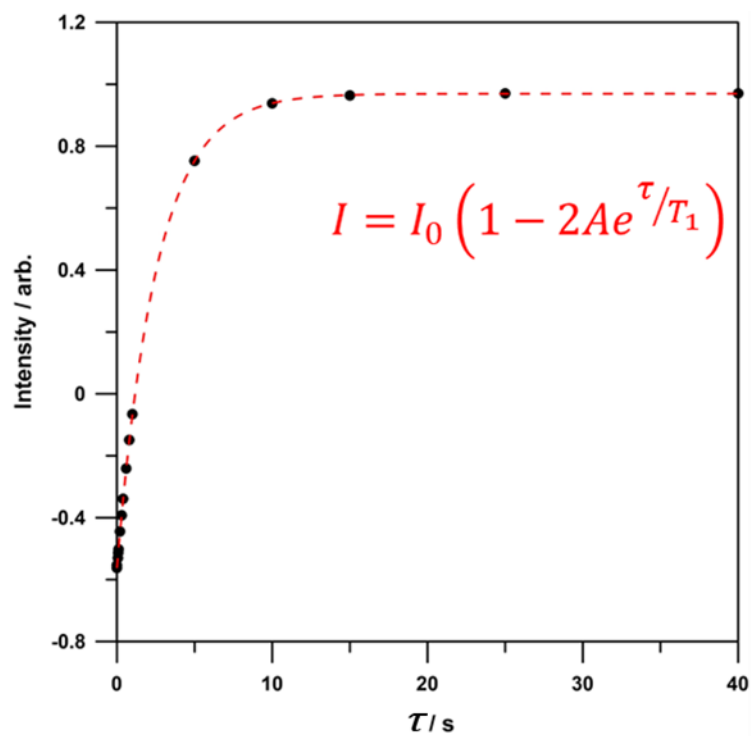

**Figure S7.** Example of data acquired from an inversion recovery experiment and the fitting procedure used to determine the spin-lattice relaxation time,  $T_1$ .
